# Supplementary material for: An anti-aggregation NIR-II heptamethine-cyanine dye with a stereo-specific cyanine for imaging-guided photothermal therapy
Source: Royal Society of Chemistry journal article supplement (doi:10.1039/d1tb00018g), 2021-01-01
Supplement: d1tb00018g1.pdf [file d1tb00018g1.pdf]

Supporting Information for:

**Anti-Aggregation NIR-II Heptamethine-Cyanine Dye with Stereo  
Structure for Imaging-Guided Photothermal Therapy**

*Hongyun Qian<sup>a</sup>, Quan Cheng<sup>a</sup>, Youliang Tian<sup>a</sup>, Huiping Dang<sup>a</sup>, Changchang Teng<sup>a</sup>, Lifeng*

*Yan<sup>a\*</sup>*

<sup>a</sup>CAS Key Laboratory of Soft Matter Chemistry, and Department of Chemical Physics,  
University of Science and Technology of China. Hefei, 230026, China.

**Contents**

- 1. Experimental Procedures**
- 2. Supporting Figures (S1~S13)**
- 3. References**



**Fig. S2.**  $^1\text{H}$  NMR spectra of HQS-Cy 1a.

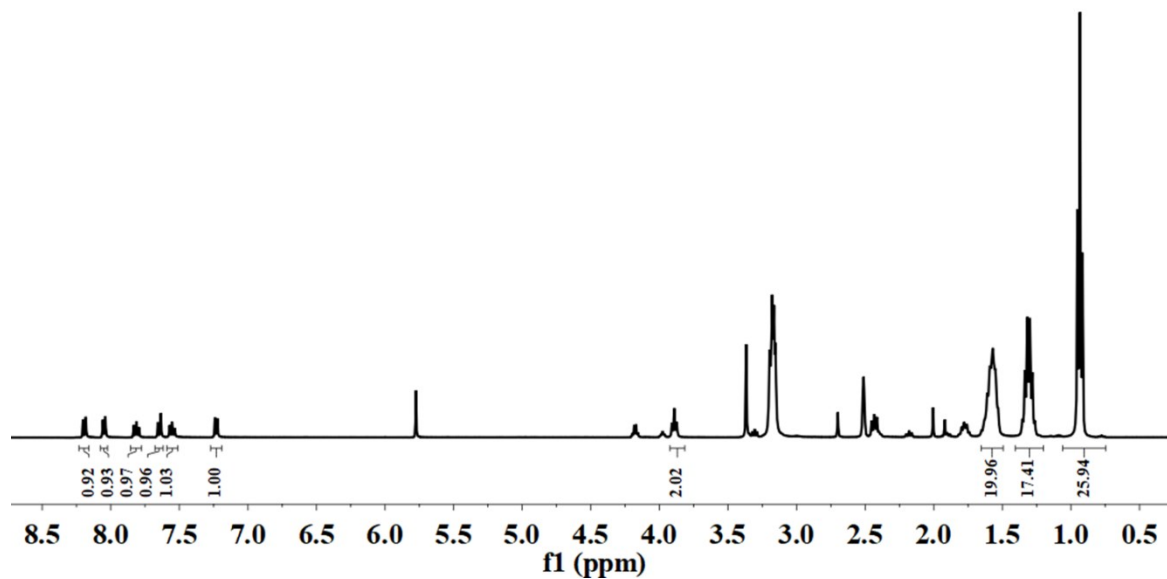

**Fig. S3.**  $^1\text{H}$  NMR spectra of HQS-Cy 2

20190710+HESI-Q1-M0705-FD-1080-3 #11-18 RT: 0.16-0.26 AV: 8 SB: 1 0.03 NL: 3.39E7  
T: FTMS+cESI Full ms [100.00-1000.00]

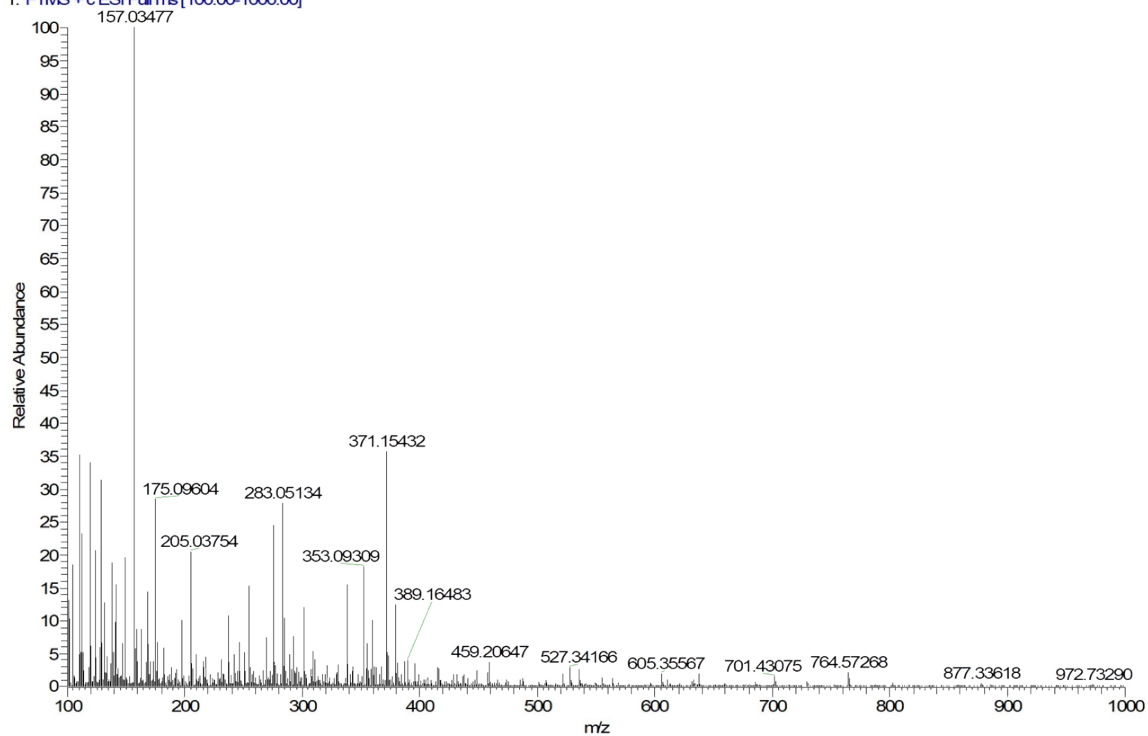

**Fig. S4.** ESI-MS of HQS-Cy 3

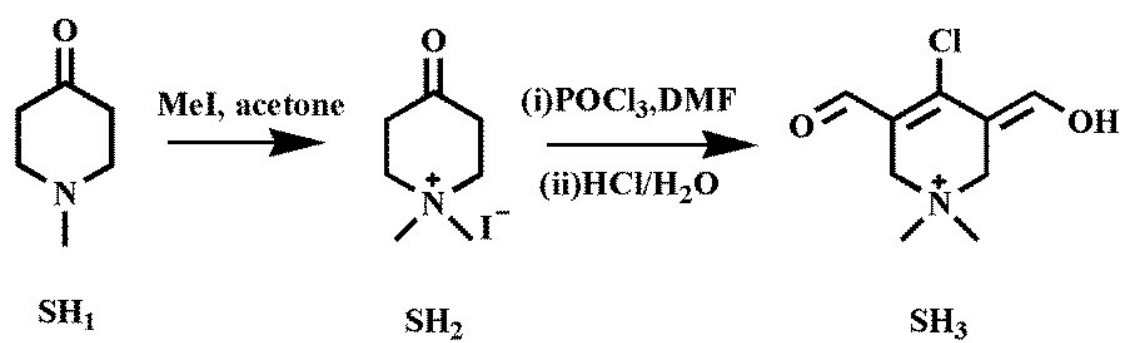

Fig. S5. Synthesis route of SH<sub>3</sub>.

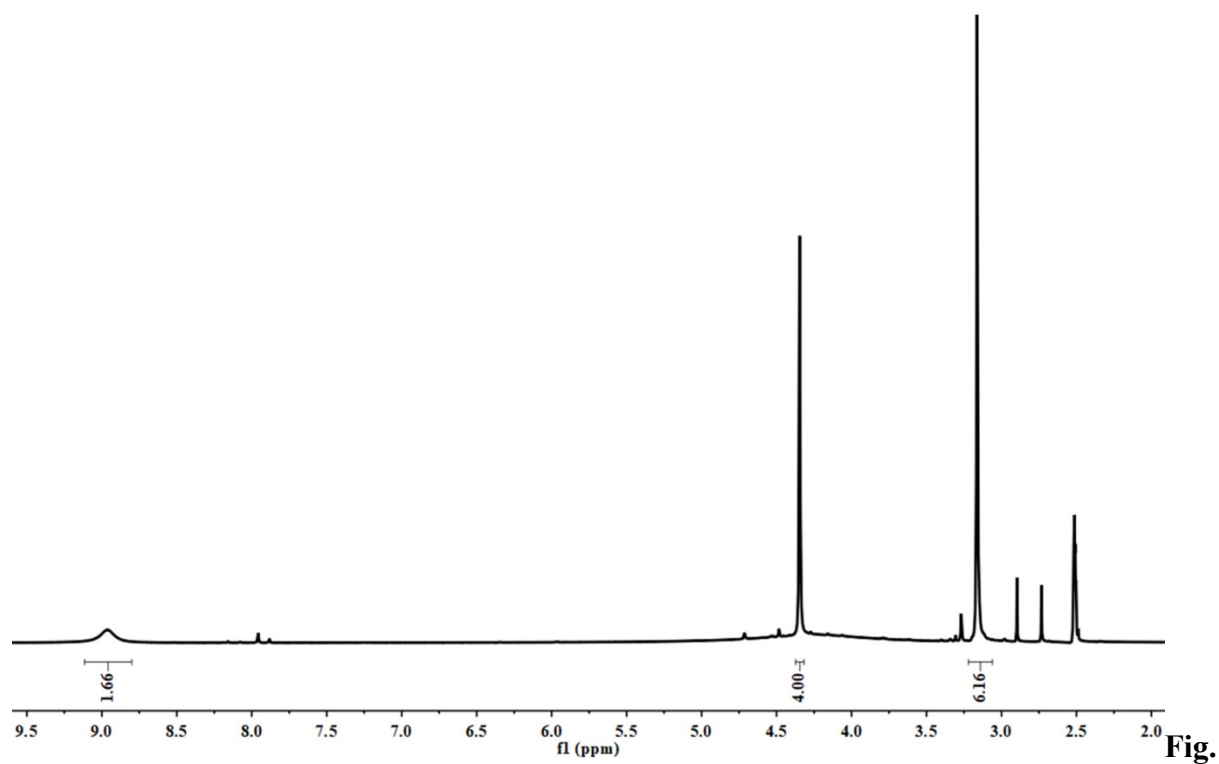

S6. <sup>1</sup>H NMR spectra of SH<sub>2</sub>.

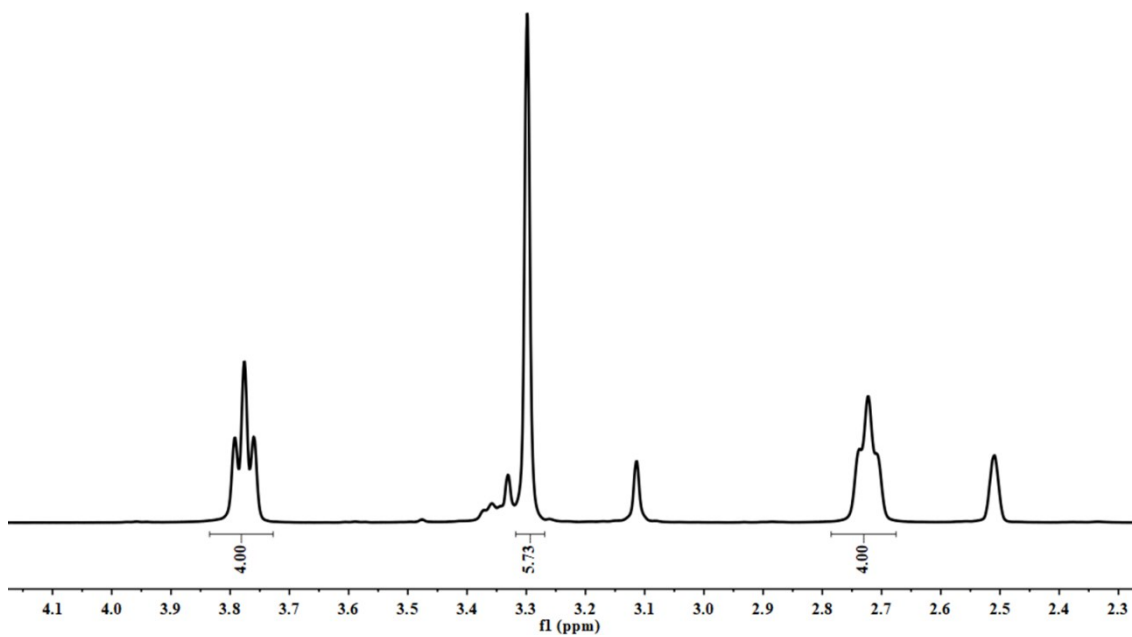

**Fig. S7.** 1H NMR spectra of SH<sub>3</sub>.

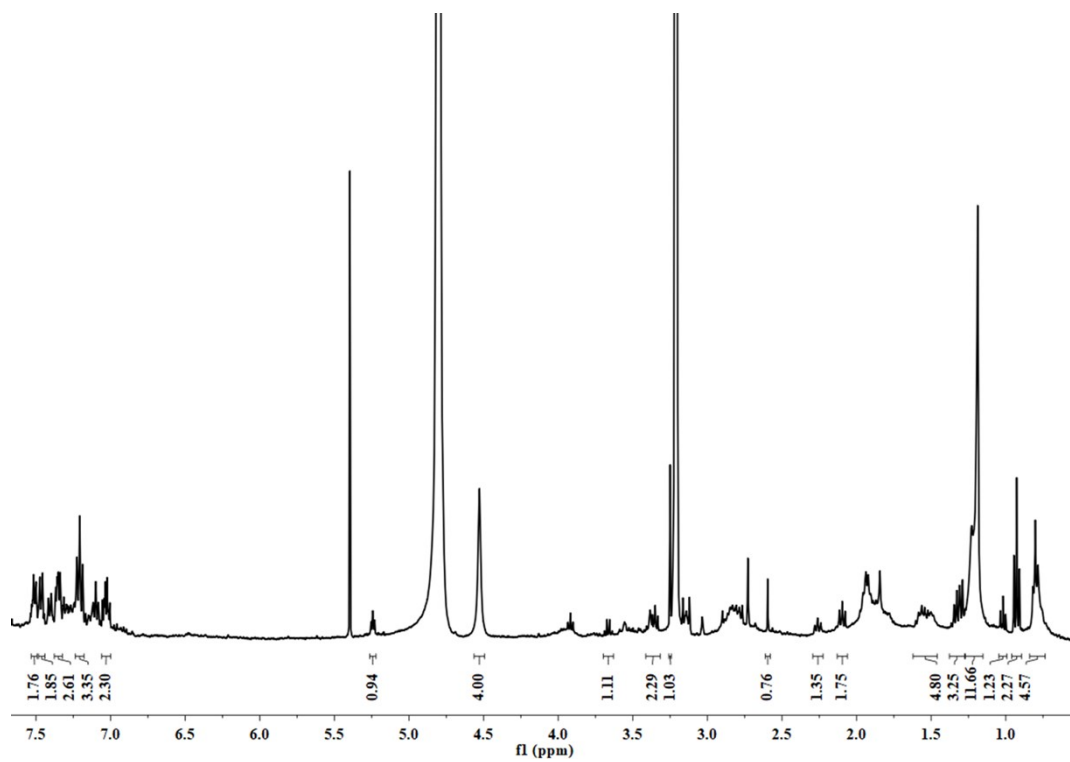

**Fig. S8.** 1H NMR spectra of HQS-Cy.

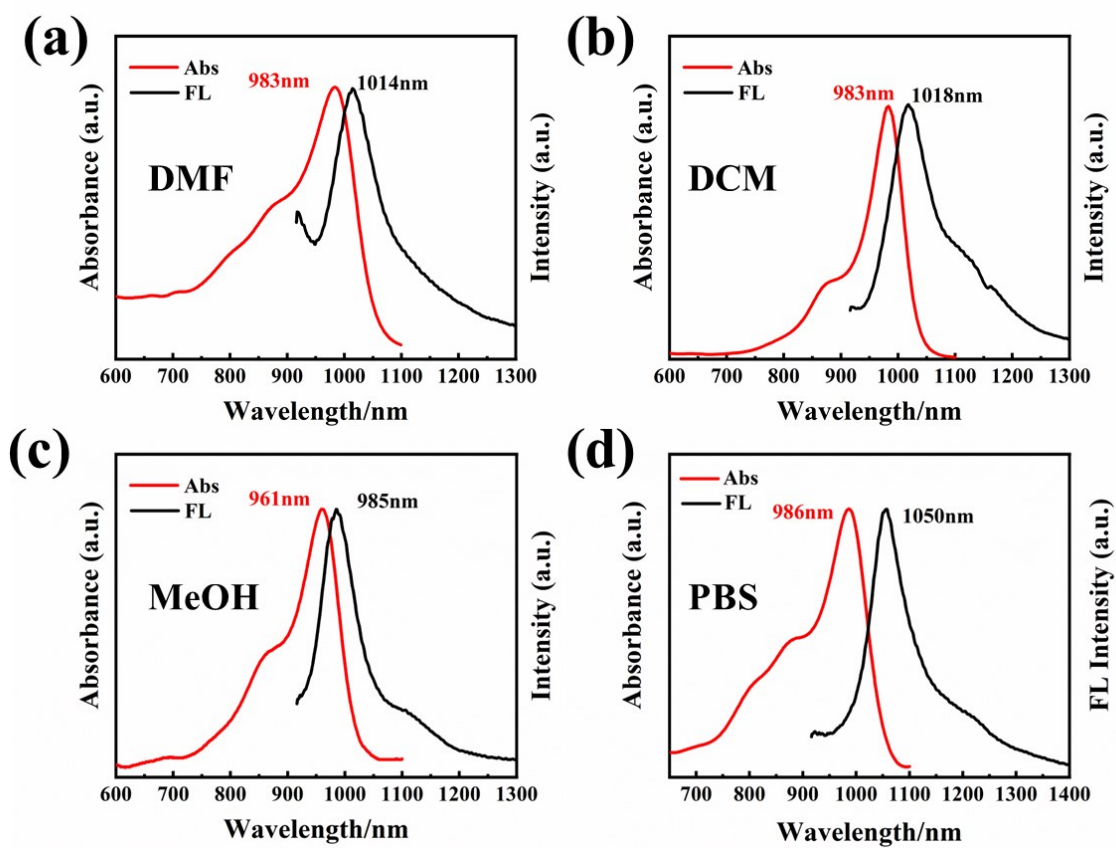

F

**ig. S9** (a) UV-vis-NIR absorbance spectra of HQS-Cy in DMF and (b) in DCM and (c) in MeOH and (d) HQS-Cy@P in PBS

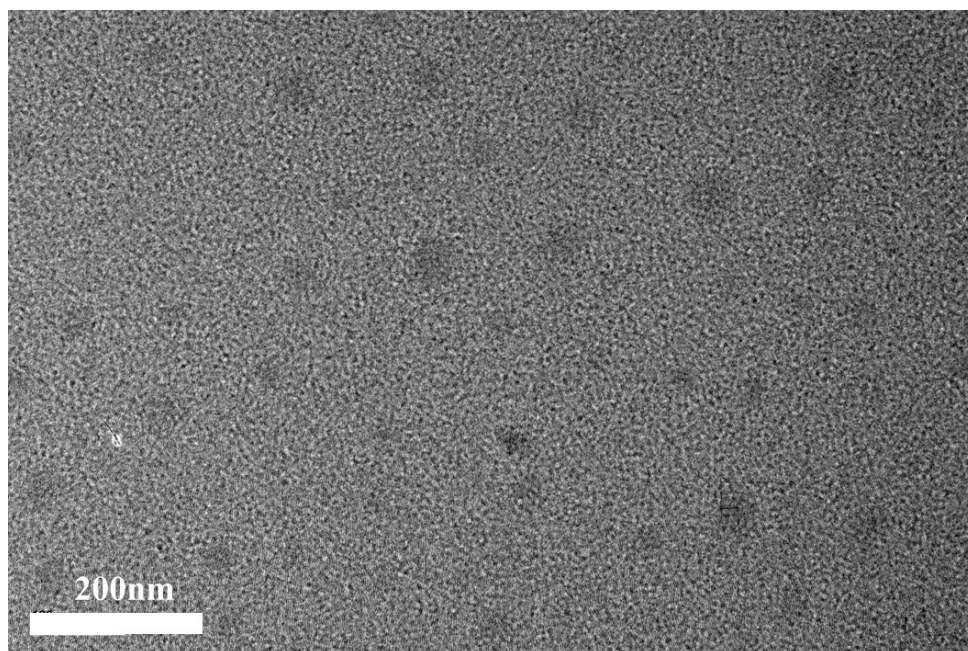

**Fig. S10** TEM image of HQS-Cy@P

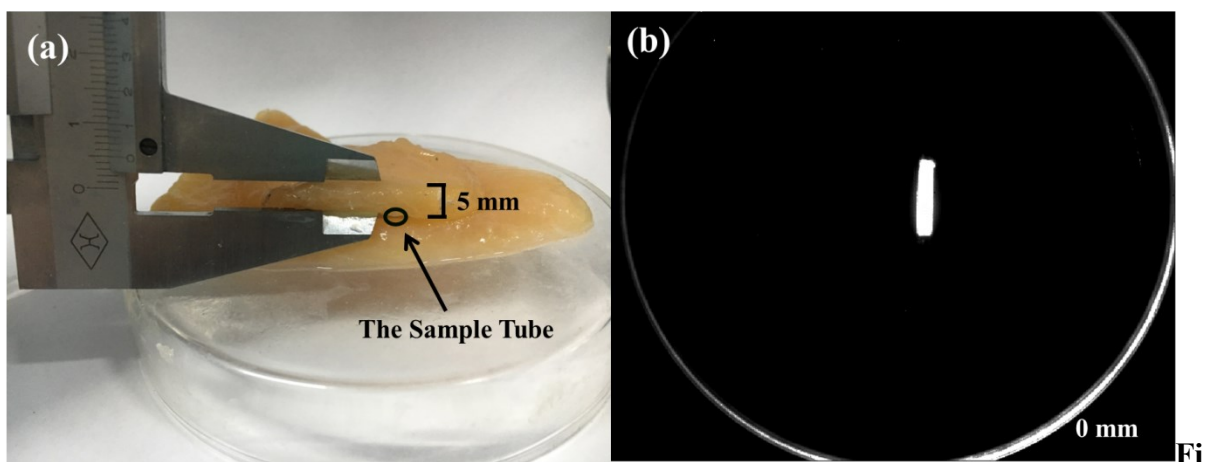

**g. S11** Chicken penetration model assay. (a) A model for the nuggets: the sample tube was covered 5 mm thickness of chicken. (b) The fluorescence image of tube with 0 mm thickness of chicken.

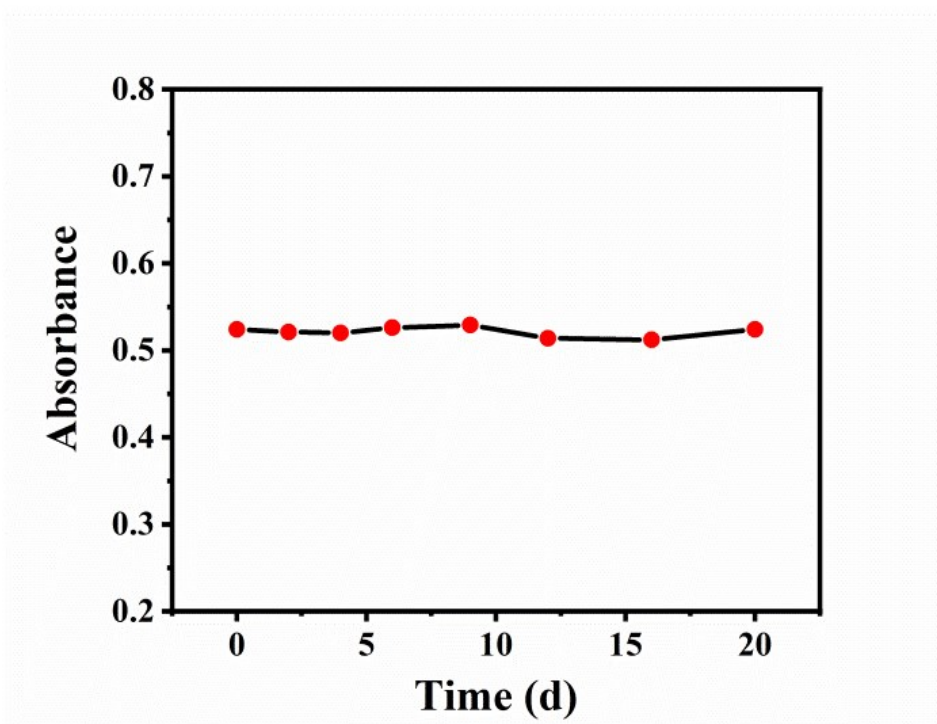

**Fig. S12** The stability of HQS-Cy@P in PBS which are stored at room temperature and out of direct sunlight



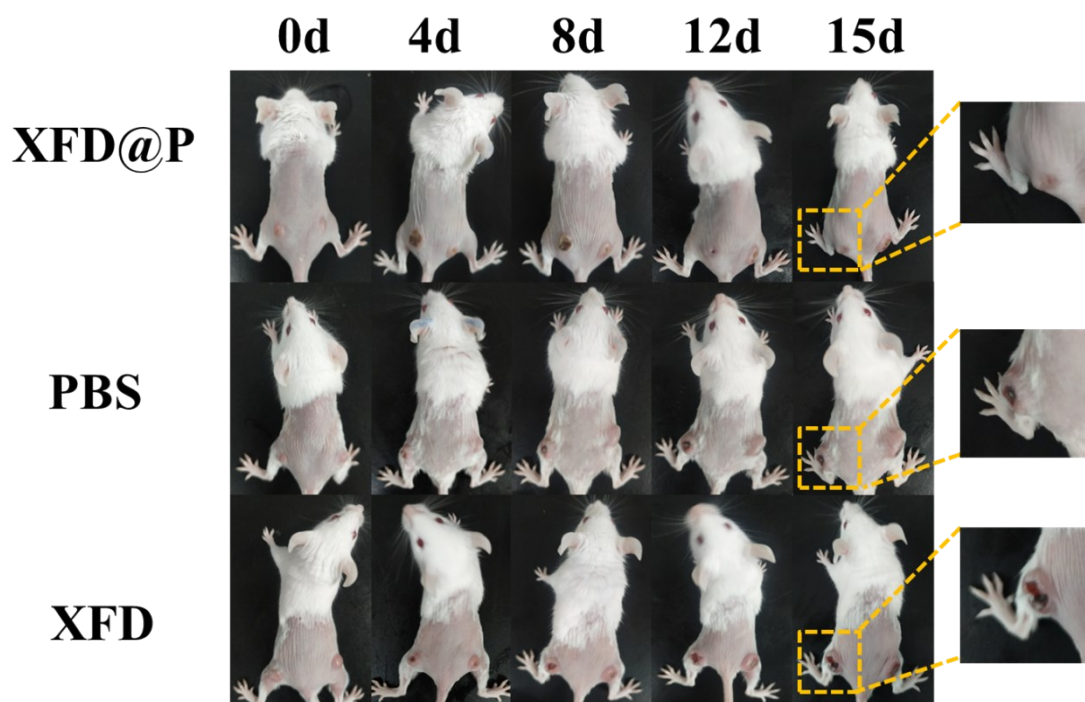

Fig. S13 Representative digital photographs of the mice during the treatment in the group of “PBS”, “HQS-Cy” and “HQS-Cy@P”

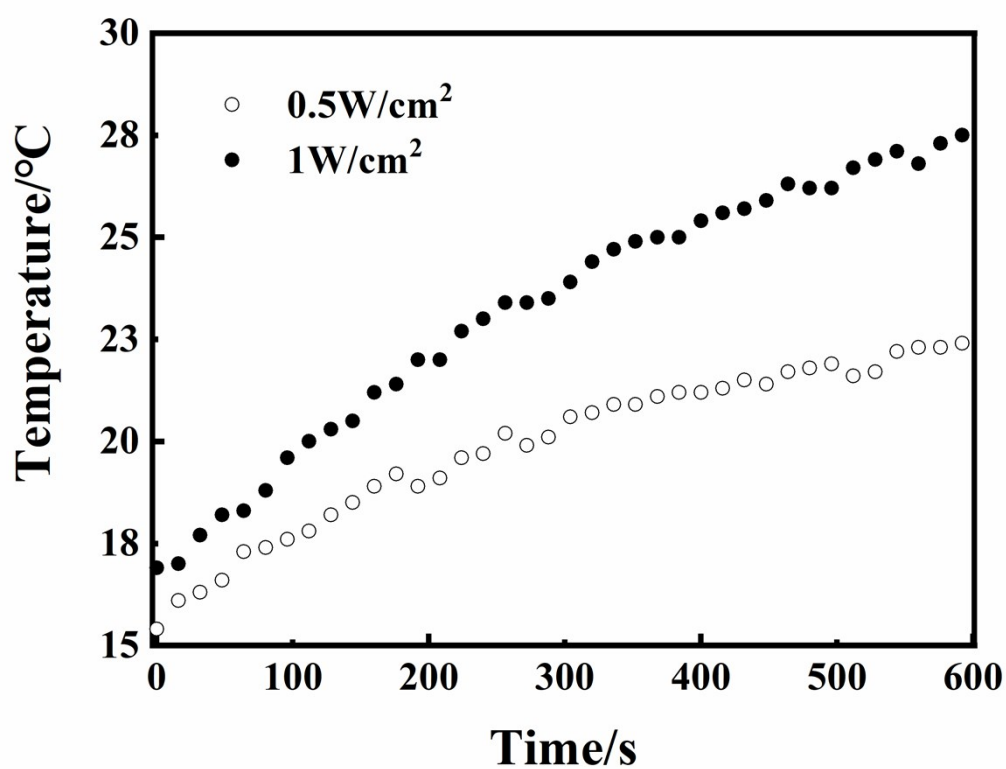

Fig. S14 The heating curve of water under the 980nm laser irradiation



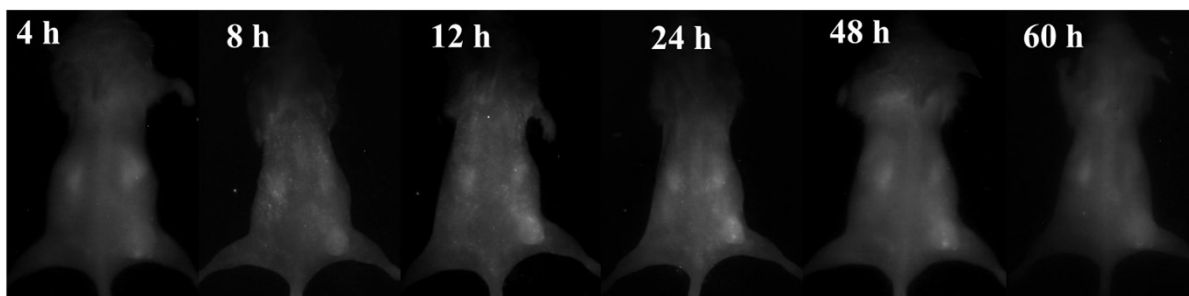

Figure S15. NIR-II fluorescence imaging of HQS-Cy@P in vivo at the selected time.

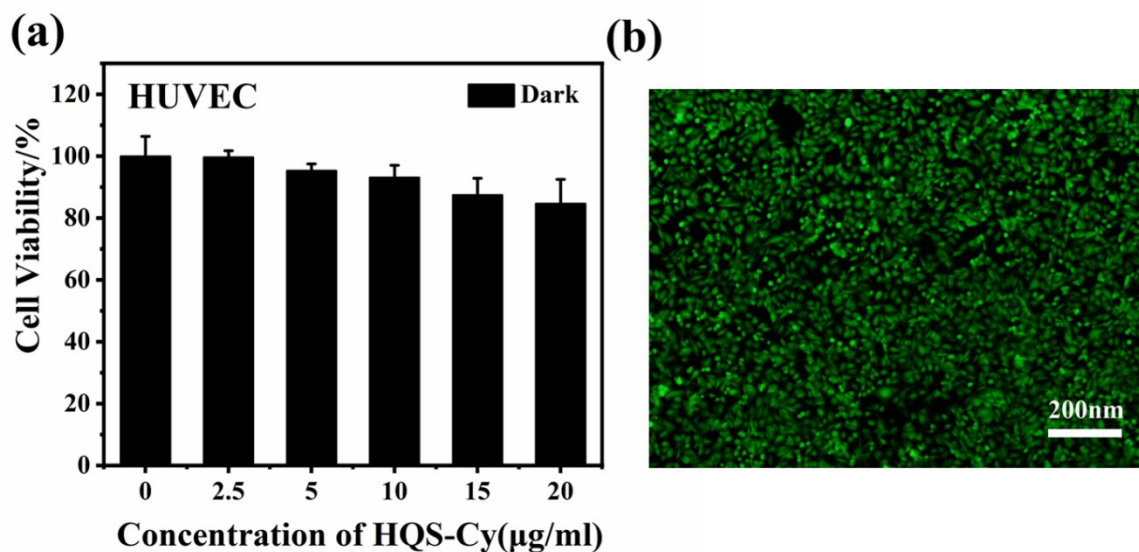

Figure S16. (a) Cytotoxicity assays of HQS-Cy@P against human umbilical vein endothelial cells (HEVUC) under dark conditions and (b) Fluorescence imaging of HUVEC cells treated with  $20\mu\text{g/mL}$  HQS-Cy@P for live/dead assays.

### 3. References

- [1] B. Li, L. Lu, M. Zhao, Z. Lei, F. Zhang, An Efficient 1064 nm NIR-II Excitation Fluorescent Molecular Dye for Deep-Tissue High-Resolution Dynamic Bioimaging, *Angew Chem Int Ed Engl* 57(25) (2018) 7483-7487.
- [2] S. Thavornpradit, S.M. Usama, G.K. Park, J.P. Shrestha, S. Nomura, Y. Baek, H.S. Choi, K. Burgess, QuatCy: A Heptamethine Cyanine Modification With Improved Characteristics, *Theranostics* 9(10) (2019) 2856-2867.
